# Supplementary material for: Magneto-structural studies on a number of doubly end-on cyanate and azide bridged dinuclear nickel(ii) complexes with {N3O} donor Schiff base ligands
Source: Royal Society of Chemistry journal article supplement (doi:10.1039/d3ra00737e), 2023-01-01
Supplement: d3ra00737e1.pdf [file d3ra00737e1.pdf]

## Supplementary Information

# Magneto-structural studies on a number of doubly end-on cyanate and azide bridged dinuclear nickel(II) complexes with {N<sub>3</sub>O} donor Schiff base ligands

Narayan Ch. Jana,<sup>a</sup> Marko Jagodič,<sup>b</sup> Paula Brandão,<sup>c</sup> Moumita Patra,<sup>a</sup> Radovan Herchel,<sup>d</sup> Zvonko Jagličić,<sup>b,e</sup> and Anangamohan Panja,<sup>\*a,f</sup>

<sup>a</sup> Department of Chemistry, Panskura Banamali College, Panskura RS, WB 721152, India. E-mail: ampanja@yahoo.co.in

<sup>b</sup> Institute of Mathematics, Physics and Mechanics, Jadranska 19, 1000 Ljubljana, Slovenia

<sup>c</sup> Department of Chemistry, CICECO-Aveiro Institute of Materials, University of Aveiro, 3810-193 Aveiro, Portugal

<sup>d</sup> Department of Inorganic Chemistry, Faculty of Science, Palacký University, 17. listopadu 12, 77146 Olomouc, Czech Republic

<sup>e</sup> Faculty of Civil and Geodetic Engineering, University of Ljubljana, Jamova 2, 1000 Ljubljana, Slovenia

<sup>f</sup> Department of Chemistry, Gokhale Memorial Girls' College, 1/1 Harish Mukherjee Road, Kolkata-700020, India.

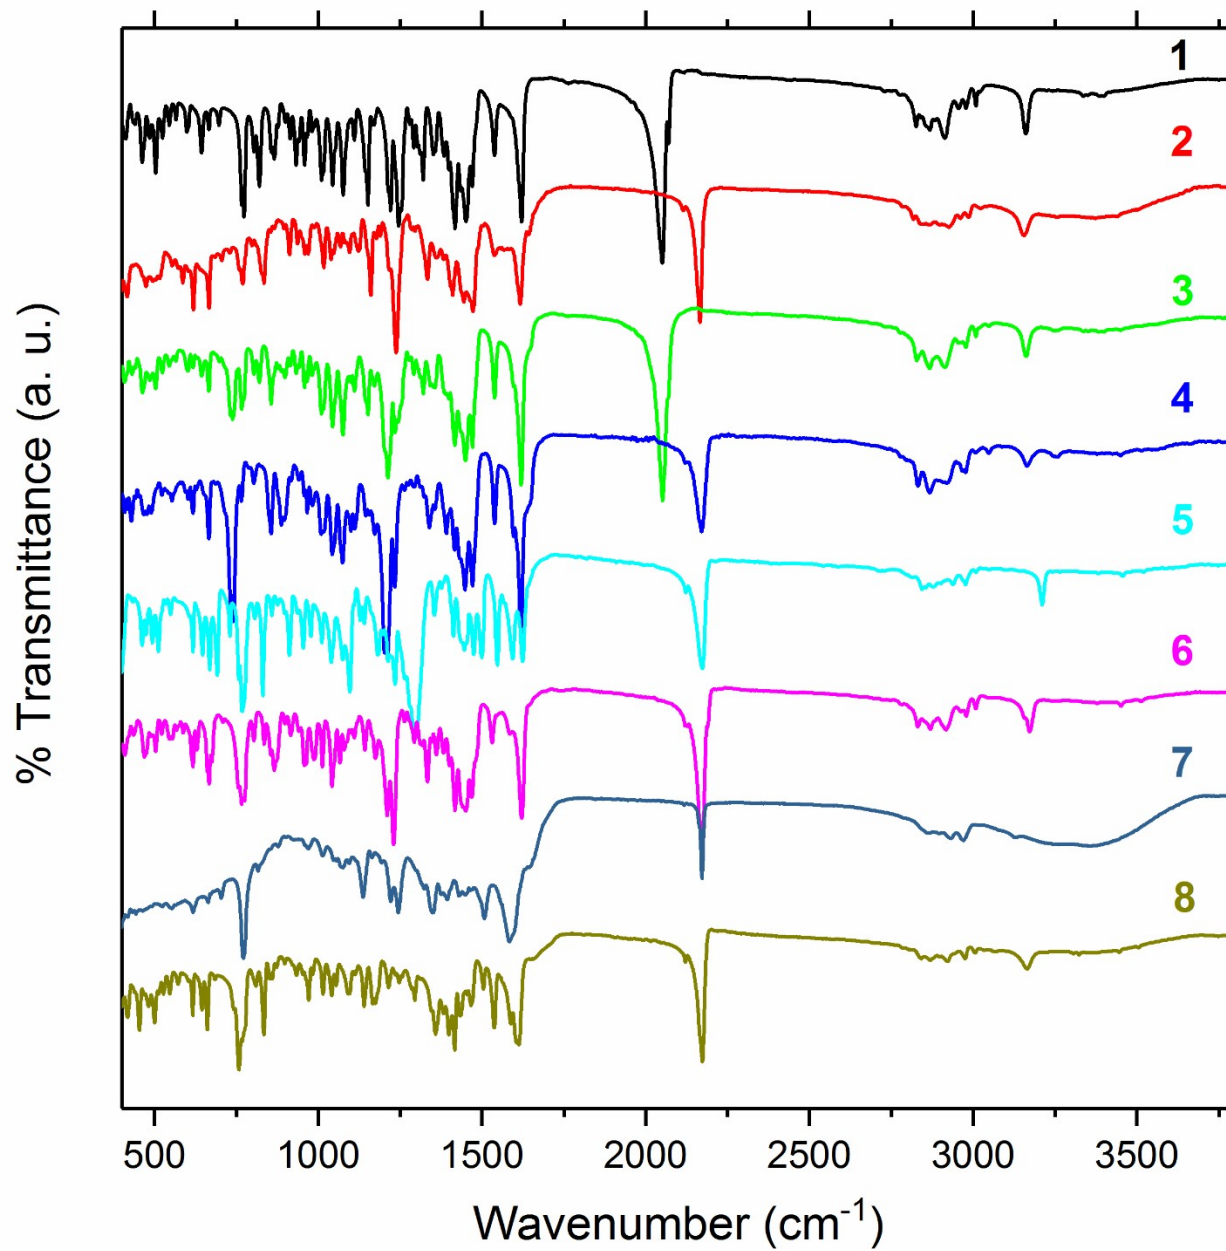

Fig. S1. IR spectra of complexes 1–8.

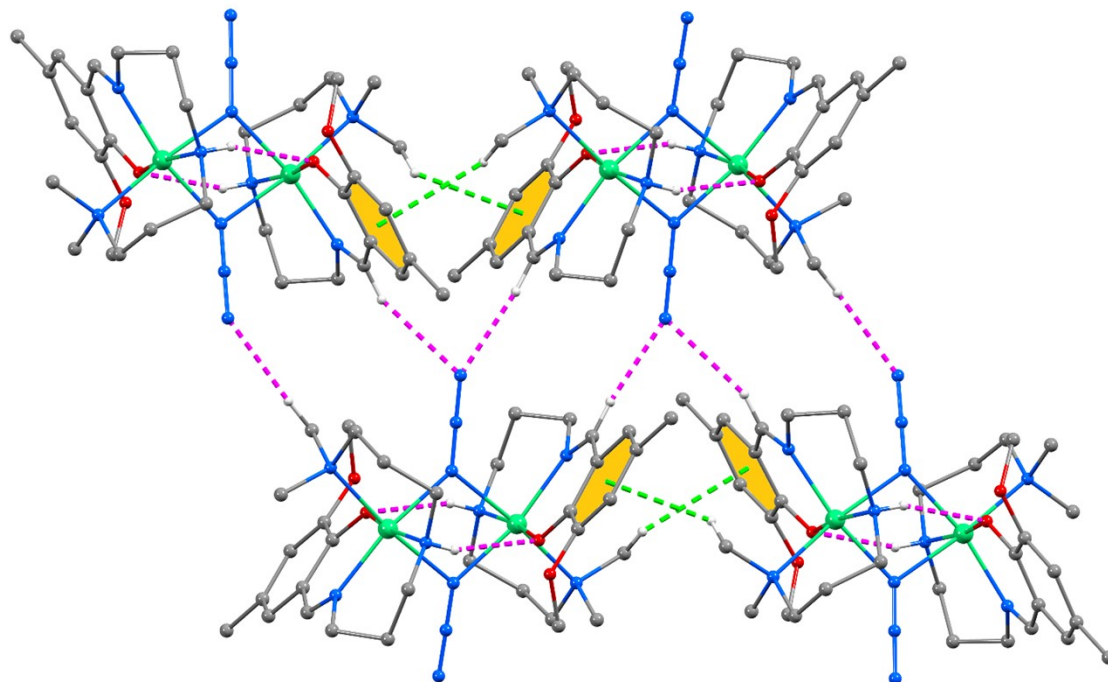

**Fig. S2.** Molecular packing in complex 1.

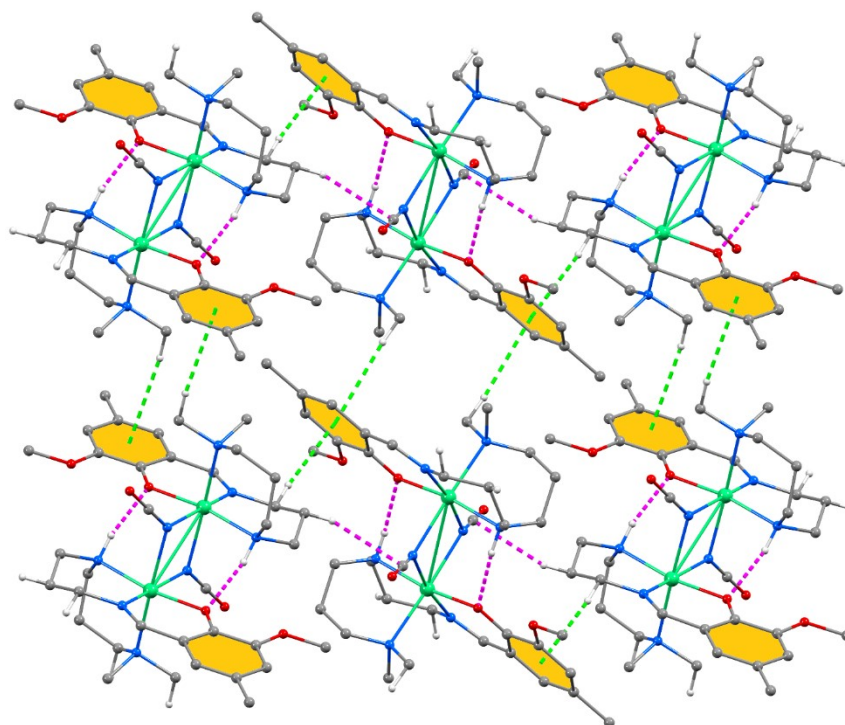

**Fig. S3.** Molecular packing in complex 2.

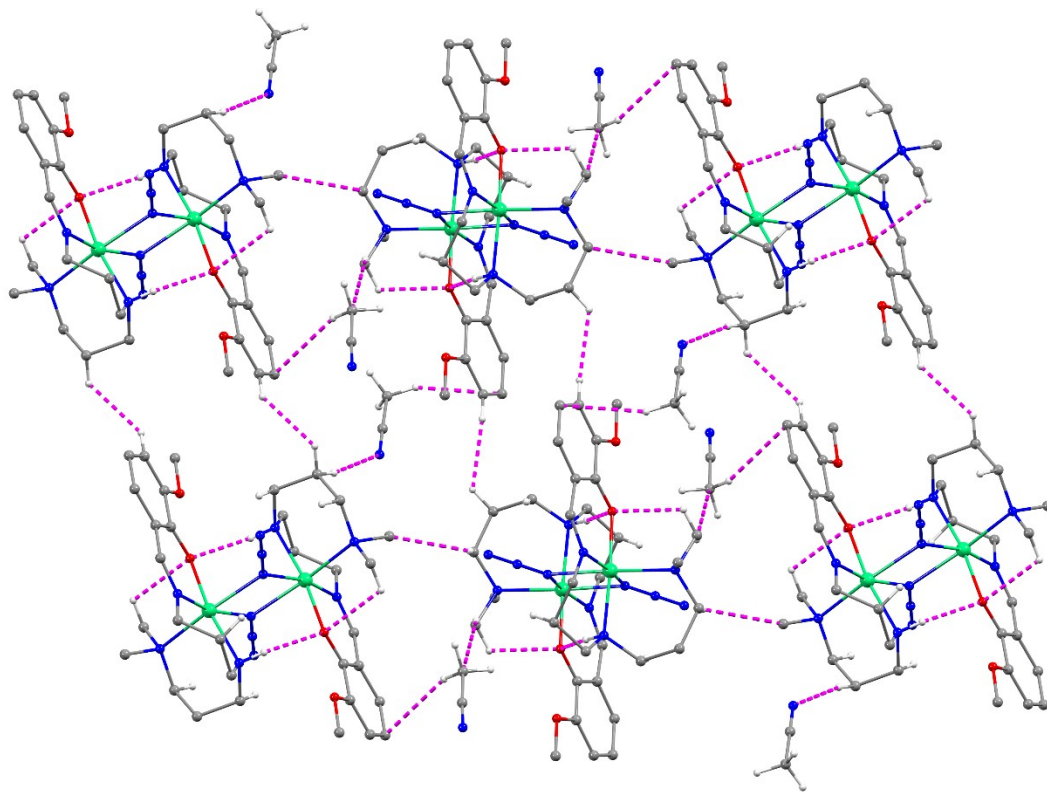

Fig. S4. Molecular packing in complex 3.

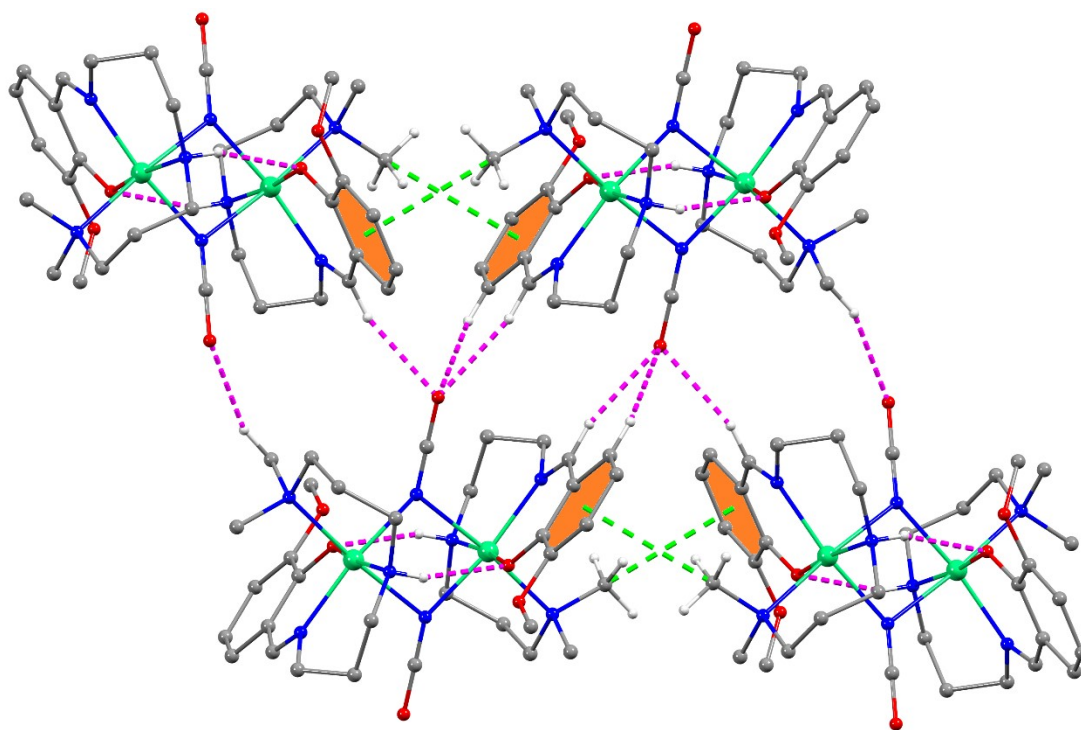

Fig. S5. Molecular packing in complex 4.

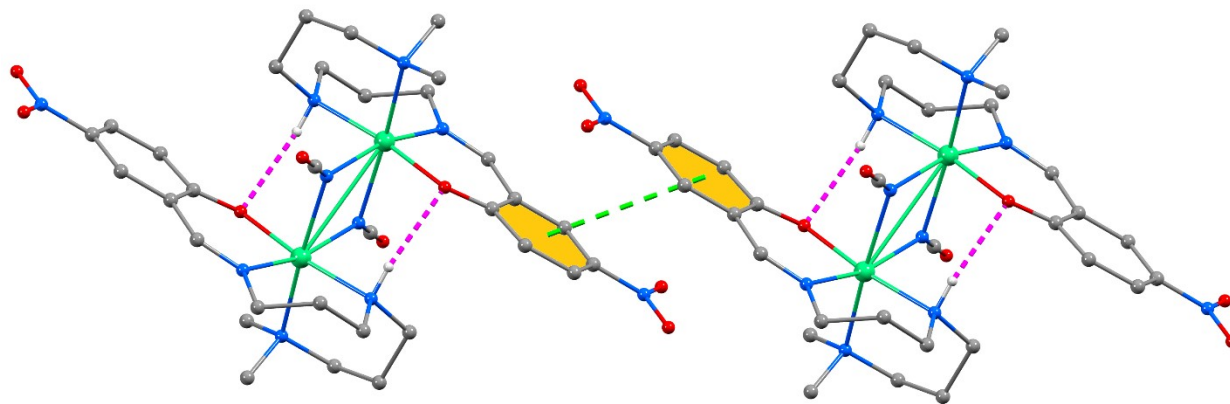

**Fig. S6.** Molecular packing in complex 5.

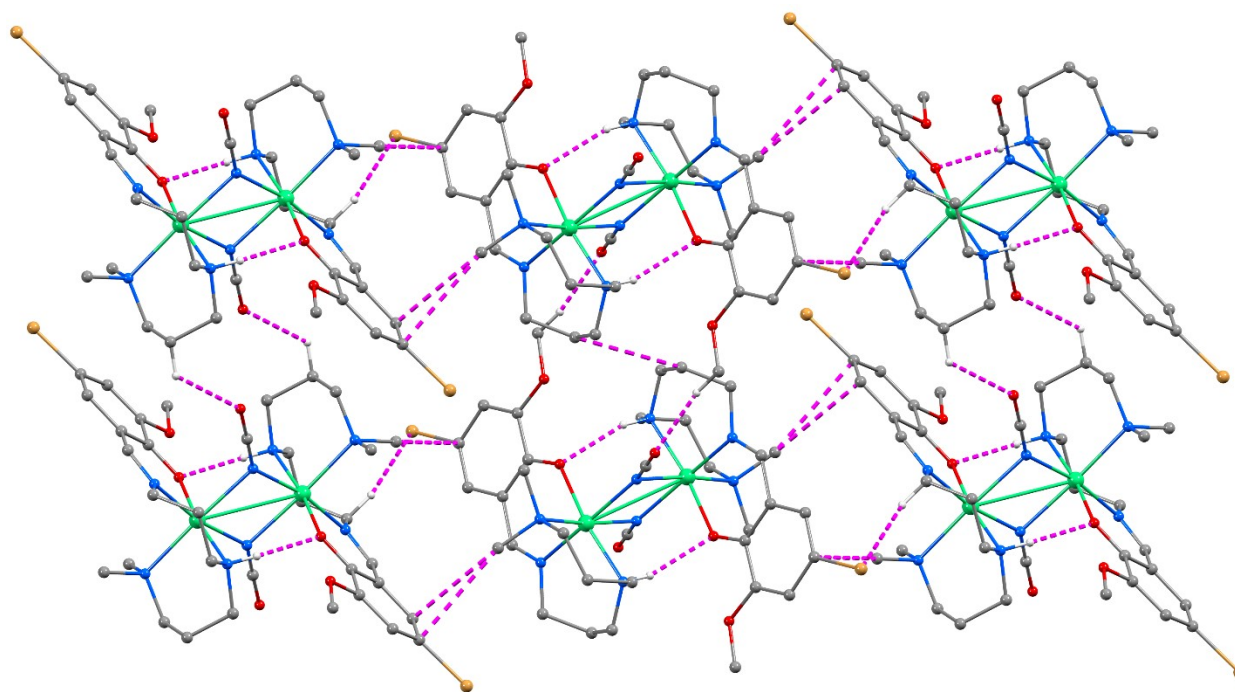

**Fig. S7.** Molecular packing in complex 6.

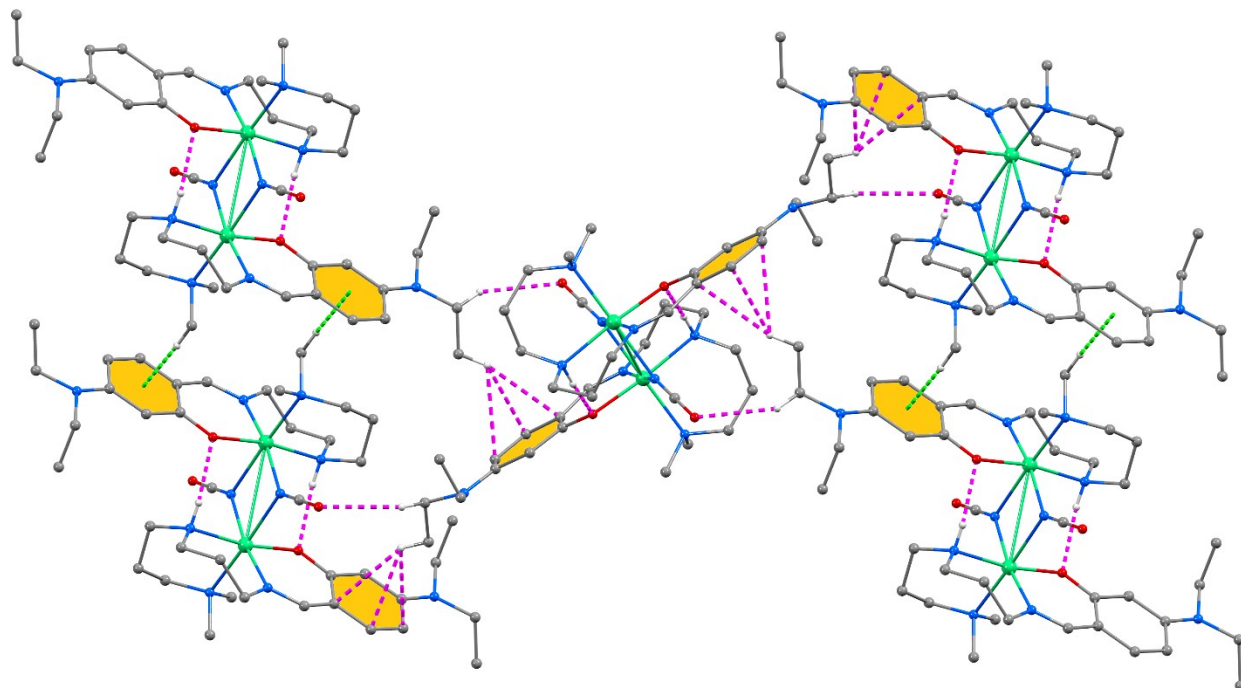

**Fig. S8.** Molecular packing in complex 7.

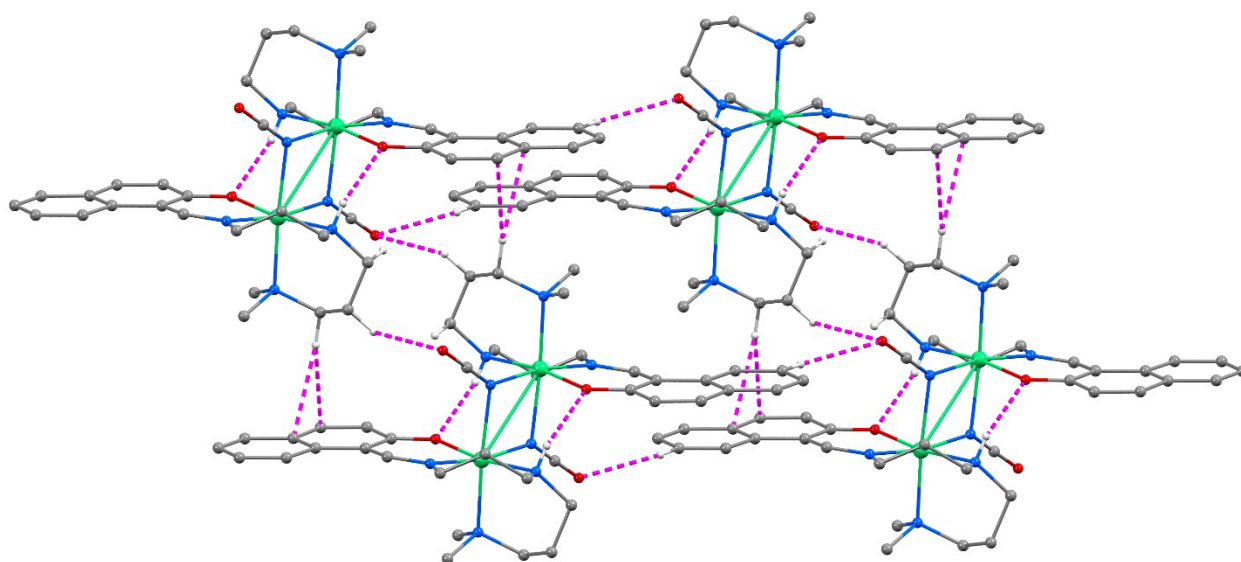

**Fig. S9.** Molecular packing in complex 8.

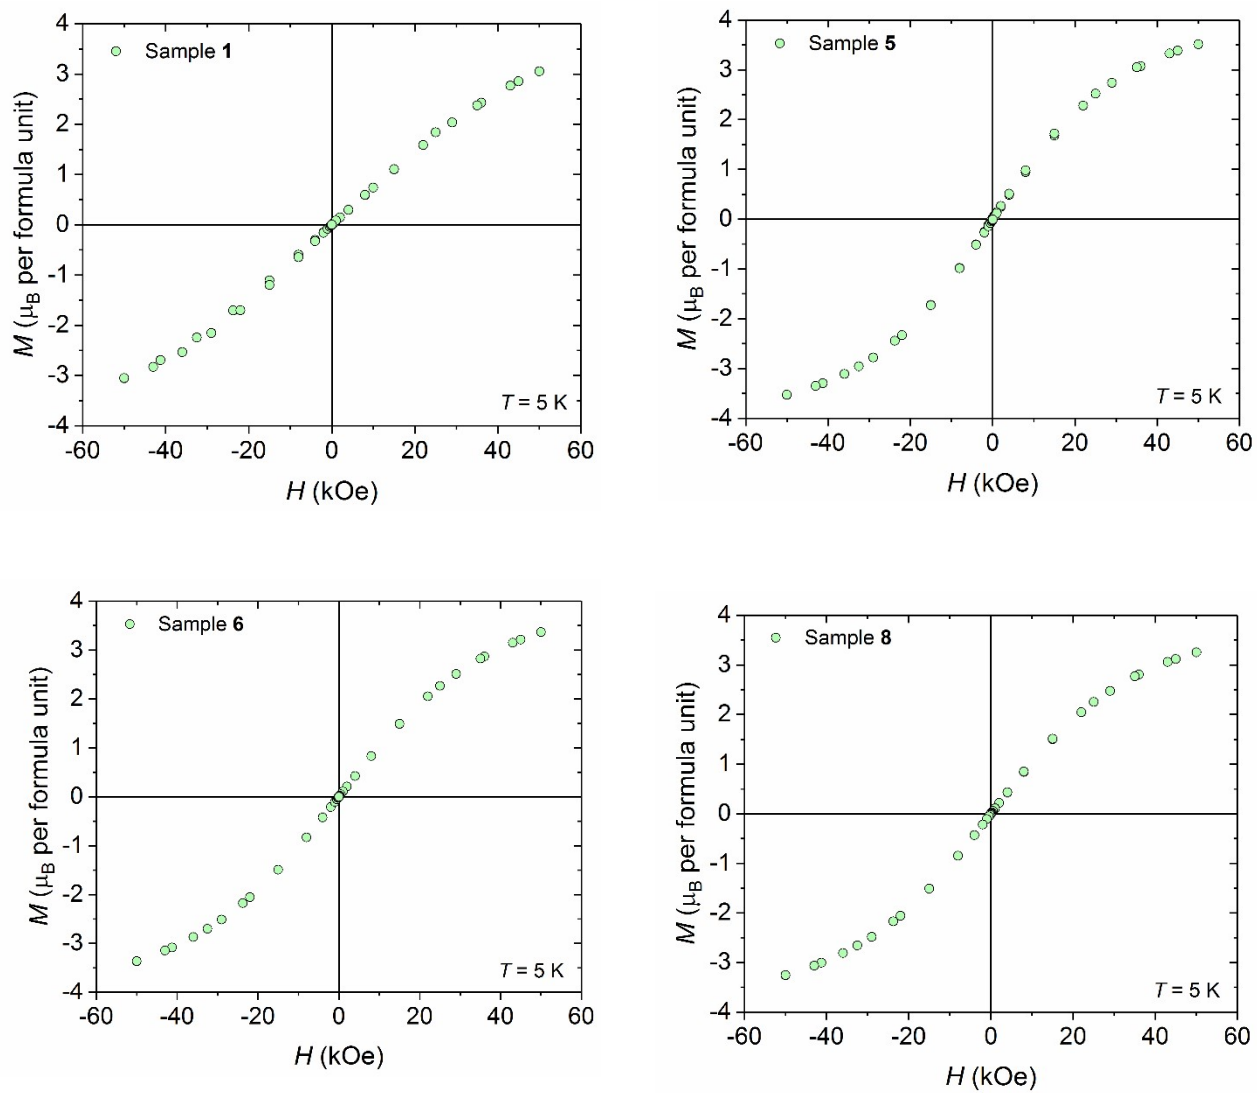

**Fig. S10.** Representative isothermal magnetization curves for complexes **1**, **5**, **6** and **8** at 5 K

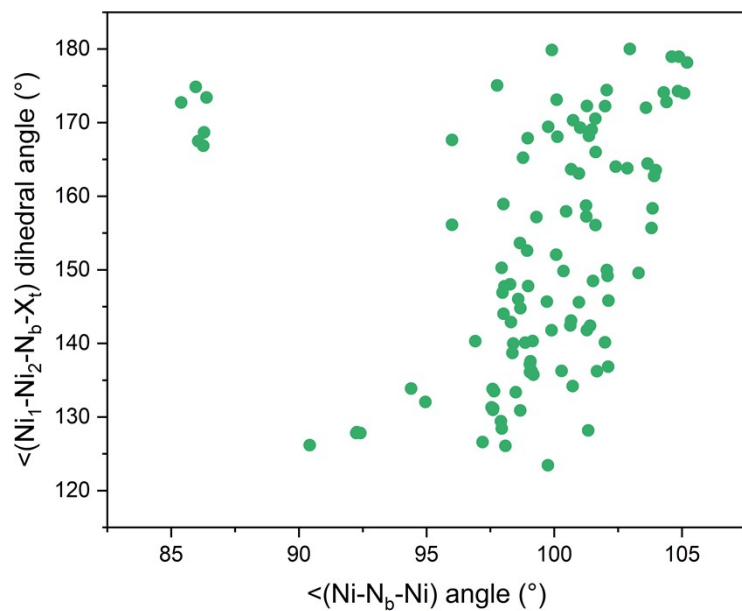

**Fig. S11.** The results of structural search in CSD for dinuclear Ni<sup>II</sup> motives comprising two azide bridging ligands as a function of Ni-N<sub>b</sub>-Ni angle and Ni1-Ni2-N<sub>b</sub>-X<sub>t</sub> dihedral angle.

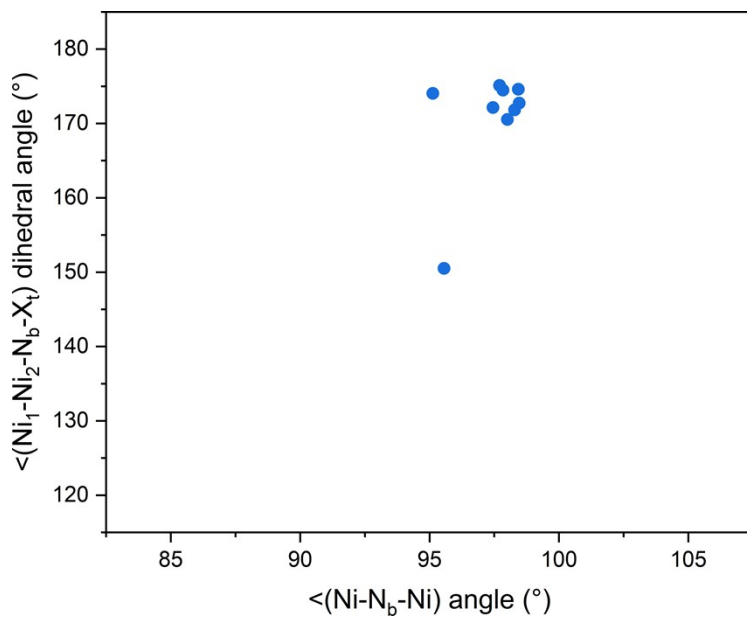

**Fig. S12.** The results of structural search in CSD for dinuclear Ni<sup>II</sup> motives comprising two cyanate bridging ligands as a function of Ni-N<sub>b</sub>-Ni angle and Ni1-Ni2-N<sub>b</sub>-X<sub>t</sub> dihedral angle.



**Table S1** The evaluation of the magnetic exchange by the broken-symmetry DFT approach for **1-8**

| Complex   | $\langle(\text{Ni-Nb-Ni})_{\text{aver.}}\rangle$<br>( $^{\circ}$ ) | $J_{B3LYP}^R$<br>( $\text{cm}^{-1}$ ) | $J_{B3LYP}^Y$<br>( $\text{cm}^{-1}$ ) | $J_{M062X}^R$<br>( $\text{cm}^{-1}$ ) | $J_{M062X}^Y$<br>( $\text{cm}^{-1}$ ) |
|-----------|--------------------------------------------------------------------|---------------------------------------|---------------------------------------|---------------------------------------|---------------------------------------|
| <b>1</b>  | 101.496                                                            | 35.23                                 | 52.76                                 | 24.11                                 | 36.10                                 |
| <b>2</b>  | 96.791                                                             | 7.35                                  | 11.02                                 | 2.80                                  | 4.19                                  |
| <b>3</b>  | 101.478                                                            | 31.51                                 | 47.19                                 | 21.35                                 | 31.97                                 |
| <b>4A</b> | 98.235                                                             | 8.75                                  | 13.11                                 | 3.87                                  | 5.81                                  |
| <b>4B</b> | 97.932                                                             | 7.46                                  | 11.19                                 | 3.01                                  | 4.52                                  |
| <b>5</b>  | 99.873                                                             | 12.30                                 | 18.44                                 | 6.48                                  | 9.72                                  |
| <b>6A</b> | 99.00                                                              | 9.81                                  | 14.70                                 | 4.48                                  | 6.72                                  |
| <b>6B</b> | 96.770                                                             | 7.22                                  | 10.83                                 | 2.28                                  | 3.41                                  |
| <b>7</b>  | 97.428                                                             | 8.41                                  | 12.60                                 | 3.62                                  | 5.43                                  |
| <b>8</b>  | 98.037                                                             | 8.45                                  | 12.66                                 | 3.71                                  | 5.57                                  |
